# Supplementary material for: Clinical Implications and Molecular Features of Extracellular Matrix Networks in Soft Tissue Sarcomas
Source: Oxford University Press journal article supplement (doi:10.1158/1078-0432.ccr-23-3960), 2024-05-29
Supplement: ccr-23-3960_supplementary_figure_s7_suppsf7.pdf [file ccr-23-3960_supplementary_figure_s7_suppsf7.pdf]

**a**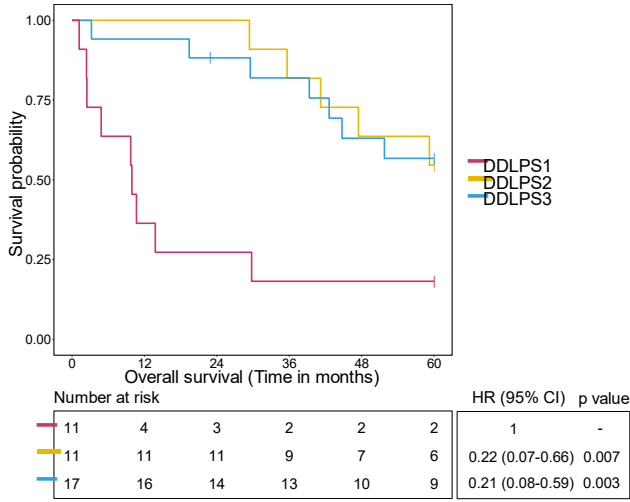**b**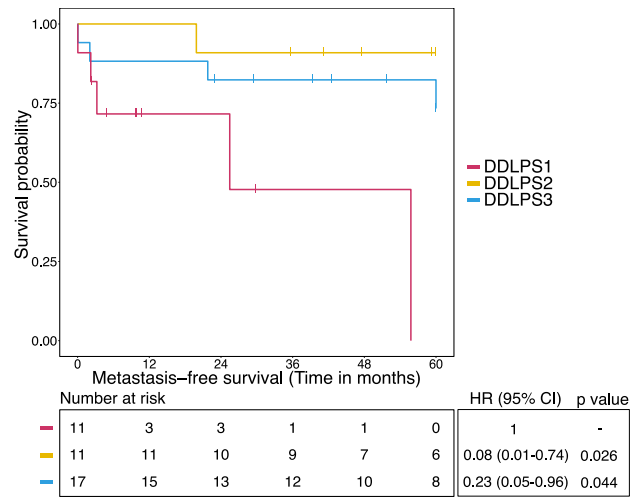

**Supplementary Figure S7. Clinical characterisation of DDLPS subgroups.** Kaplan-Meier plots of (a) overall survival and (b) metastasis-free survival with stratification by DDLPS subgroups. Hazard ratio (HR), 95% confidence intervals (CI) and p-values were determined by univariate Cox regression with a two-sided Wald test.
